# Supplementary material for: In vivo microscopic voxel-based morphometry with a brain template to characterize strain-specific structures in the mouse brain
Source: Springer Nature journal article supplement (doi:10.1038/s41598-017-00148-1), 2017-03-01
Supplement: 41598_2017_148_MOESM1_ESM.pdf [file 41598_2017_148_MOESM1_ESM.pdf]

# Supplementary Materials for

***In vivo* microscopic voxel-based morphometry with a brain template**

**to characterize strain-specific structures in the mouse brain**

Keigo Hikishima, Yuji Komaki, Fumiko Seki, Yasuyuki Ohnishi, Hirotaka J. Okano,  
and Hideyuki Okano\*

\* Correspondence to: Hideyuki Okano (hidokano@a2.keio.jp)

**This PDF file includes:**

Table S1

**Table S1. Gray matter volume differences according to brain region among four inbred mice strains**  
Significant differences in the gray matter volume of specific brain regions are shown, as identified via voxel-based morphometry ( $p < 0.05$ , family-wise error-corrected,  $>119$  voxels).

| <b>C57Bl/6 &gt; BALB/cBy</b> |                                                       |      |      |      | <b>BALB/cBy &gt; C57Bl/6</b> |              |                                                |      |      |      |          |
|------------------------------|-------------------------------------------------------|------|------|------|------------------------------|--------------|------------------------------------------------|------|------|------|----------|
| Cluster size                 | Anatomical location                                   | X    | Y    | Z    | Z-scores                     | Cluster size | Anatomical location                            | X    | Y    | Z    | Z-scores |
| 2961                         | obolfactory bulb, right                               | -0.9 | 2.7  | -3.7 | 5.8                          | 340          | lobules 3 of the cerebellar vermis, left       | 0.1  | -6.0 | -2.2 | 4.8      |
|                              | obolfactory bulb, left                                | 1.0  | 2.8  | -3.9 | 4.7                          |              |                                                |      |      |      |          |
| 1051                         | subiculum transition area, right                      | -3.8 | -4.6 | -3.2 | 5.2                          |              |                                                |      |      |      |          |
| 235                          | anteromedial thalamic nucleus, right                  | -0.6 | -1.1 | -4.0 | 5.1                          |              |                                                |      |      |      |          |
| 551                          | primally auditory cortex, right                       | -4.2 | -3.2 | -2.3 | 5.0                          |              |                                                |      |      |      |          |
| <b>C57Bl/6 &gt; C3H/He</b>   |                                                       |      |      |      | <b>C3H/He &gt; C57Bl/6</b>   |              |                                                |      |      |      |          |
| Cluster size                 | Anatomical location                                   | X    | Y    | Z    | Z-scores                     | Cluster size | Anatomical location                            | X    | Y    | Z    | Z-scores |
| 6039                         | olfactory bulb, right                                 | -0.2 | 2.9  | -3.7 | 7.4                          | 1360         | lobules 6 of the cerebellar vermis, right      | -0.8 | -8.0 | -1.7 | 6.3      |
| 1519                         | primally visual cortex, right                         | -2.4 | -5.2 | -1.3 | 6.1                          |              | lobules 6 of the cerebellar vermis, left       | 0.7  | -8.2 | -1.8 | 6.1      |
| 1590                         | primally visual cortex, left                          | 2.0  | -5.2 | -1.1 | 5.8                          | 259.0        | simple lobule, right                           | -2.2 | -6.0 | 1.4  | 6.2      |
| 148                          | secondary somatosensory cortex, right                 | -4.5 | -0.7 | -3.3 | 5.2                          | 2863         | lobules 2 and 3 of the cerebellar vermis, left | 0.3  | -6.0 | -2.3 | 5.7      |
|                              |                                                       |      |      |      |                              | 760          | simple lobule, right                           | -2.6 | -6.1 | -2.9 | 5.5      |
|                              |                                                       |      |      |      |                              | 713          | simple lobule, left                            | 2.3  | -6.8 | -2.0 | 5.1      |
|                              |                                                       |      |      |      |                              | 365          | crus 2 of the ansiform lobule, right           | -2.7 | -7.9 | -3.1 | 5.1      |
| <b>C57Bl/6 &gt; DBA/2</b>    |                                                       |      |      |      | <b>DBA/2 &gt; C57Bl/6</b>    |              |                                                |      |      |      |          |
| Cluster size                 | Anatomical location                                   | X    | Y    | Z    | Z-scores                     | Cluster size | Anatomical location                            | X    | Y    | Z    | Z-scores |
| 21004                        | secondary somatosensory cortex, right                 | -4.4 | -0.8 | -3.3 | 7.3                          |              |                                                |      |      |      |          |
|                              | primally auditory cortex, right                       | -4.1 | -2.9 | -2.5 | 6.7                          |              | not detected                                   |      |      |      |          |
|                              | primally somatosensory cortex, forelimb region, right | -2.2 | 0.8  | -2.0 | 6.6                          |              |                                                |      |      |      |          |
|                              | primally somatosensory cortex, barrel field, right    | -3.4 | -1.1 | -1.8 | 6.3                          |              |                                                |      |      |      |          |
|                              | insular cortex, right                                 | -2.8 | 1.5  | -3.7 | 5.8                          |              |                                                |      |      |      |          |
| 2143                         | field CA1 of the hippocampus, left                    | 1.5  | -3.2 | -1.6 | 6.9                          |              |                                                |      |      |      |          |
|                              | dentate gyrus, left                                   | 2.9  | -4.0 | -2.8 | 5.9                          |              |                                                |      |      |      |          |
| 2503                         | field CA1 of the hippocampus, right                   | -1.8 | -3.6 | -2.0 | 6.9                          |              |                                                |      |      |      |          |
|                              | dentate gyrus, right                                  | -2.6 | -4.0 | -2.6 | 5.9                          |              |                                                |      |      |      |          |
|                              | dorsal subiculum, right                               | -0.6 | -2.5 | -1.9 | 5.6                          |              |                                                |      |      |      |          |
| 18973                        | primally auditory cortex, left                        | 4.6  | -2.6 | -2.1 | 6.8                          |              |                                                |      |      |      |          |
|                              | primally somatosensory cortex, barrel field, left     | 3.4  | -1.4 | -1.4 | 6.6                          |              |                                                |      |      |      |          |
|                              | secondary somatosensory area, left                    | 4.6  | -1.0 | -3.3 | 6.0                          |              |                                                |      |      |      |          |
| 856                          | lateral orbital cortex, left                          | 1.8  | 2.4  | -2.5 | 6.0                          |              |                                                |      |      |      |          |
| 658                          | insular cortex, left                                  | 2.6  | 1.6  | -3.9 | 5.9                          |              |                                                |      |      |      |          |
| 738                          | olfactory bulb                                        | -0.2 | 3.0  | -3.7 | 5.3                          |              |                                                |      |      |      |          |
| <b>BALB/cBy &gt; C3H/He</b>  |                                                       |      |      |      | <b>C3H/He &gt; BALB/cBy</b>  |              |                                                |      |      |      |          |
| Cluster size                 | Anatomical location                                   | X    | Y    | Z    | Z-scores                     | Cluster size | Anatomical location                            | X    | Y    | Z    | Z-scores |
|                              | not detected                                          |      |      |      |                              | 1096         | simple lobule, left                            | 2.5  | -5.7 | -3.2 | 6.3      |
|                              |                                                       |      |      |      |                              | 5986         | field CA3 of the hippocampus, right            | -2.9 | -3.0 | -4.6 | 6.1      |
|                              |                                                       |      |      |      |                              | 506          | accumbens nucleus, core, left                  | 0.8  | 1.3  | -3.8 | 5.4      |
|                              |                                                       |      |      |      |                              | 1055         | anteromedial thalamic nucleus, right           | -0.4 | -1.1 | -3.9 | 5.3      |
|                              |                                                       |      |      |      |                              |              | anteromedial thalamic nucleus, left            | 0.2  | -0.6 | -3.9 | 5.1      |
|                              |                                                       |      |      |      |                              | 219          | lobules 6 of the cerebellar vermis, right      | -0.7 | -8.0 | -1.7 | 5.2      |
|                              |                                                       |      |      |      |                              | 1757         | field CA3 of the hippocampus, left             | 2.3  | -3.6 | -4.5 | 5.1      |
|                              |                                                       |      |      |      |                              | 573          | simple lobule, right                           | -2.2 | -5.8 | -3.1 | 4.8      |
|                              |                                                       |      |      |      |                              | 185          | accumbens nucleus, core, right                 | -0.7 | 1.5  | -3.7 | 4.7      |
| <b>BALB/cBy &gt; DBA/2</b>   |                                                       |      |      |      | <b>DBA/2 &gt; BALB/cBy</b>   |              |                                                |      |      |      |          |
| Cluster size                 | Anatomical location                                   | X    | Y    | Z    | Z-scores                     | Cluster size | Anatomical location                            | X    | Y    | Z    | Z-scores |
| 1302                         | temporal association cortex, right                    | -4.8 | -4.0 | -3.1 | 6.3                          |              |                                                |      |      |      |          |
| 1475                         | field CA1 of the hippocampus, left                    | 1.5  | -3.3 | -1.7 | 5.9                          |              | not detected                                   |      |      |      |          |
| 2251                         | accumbens nucleus, core, right                        | -1.4 | 0.5  | -4.3 | 5.6                          |              |                                                |      |      |      |          |
|                              | ventral pallidum, right                               | -1.9 | -0.1 | -4.9 | 4.9                          |              |                                                |      |      |      |          |
| 776                          | field CA1 of the hippocampus, right                   | -1.8 | -3.7 | -1.9 | 5.3                          |              |                                                |      |      |      |          |
| 865                          | primally somatosensory cortex, barrel field, left     | 3.4  | -1.4 | -1.4 | 5.3                          |              |                                                |      |      |      |          |
| 1010                         | primally auditory cortex, left                        | 4.6  | -2.2 | -2.1 | 5.3                          |              |                                                |      |      |      |          |
| 192                          | primally auditory cortex, right                       | -3.9 | -2.5 | -2.7 | 5.3                          |              |                                                |      |      |      |          |
| 980                          | insular cortex, right                                 | -1.9 | 2.2  | -2.6 | 5.2                          |              |                                                |      |      |      |          |
| 377                          | secondly auditory cortex, ventral area, right         | -4.7 | -2.0 | -2.6 | 5.2                          |              |                                                |      |      |      |          |
| 404                          | insular cortex, Left                                  | 1.8  | 2.3  | -2.7 | 5.2                          |              |                                                |      |      |      |          |
| <b>C3H/He &gt; DBA/2</b>     |                                                       |      |      |      | <b>DBA/2 &gt; C3H/He</b>     |              |                                                |      |      |      |          |
| Cluster size                 | Anatomical location                                   | X    | Y    | Z    | Z-scores                     | Cluster size | Anatomical location                            | X    | Y    | Z    | Z-scores |
| 28989                        | field CA1 of the hippocampus, left                    | 1.4  | -3.2 | -1.6 | 7.7                          | 717          | obolfactory bulb, left                         | 0.2  | 2.6  | -3.8 | 5.2      |
|                              | dorsal subiculum, left                                | 0.6  | -2.6 | -1.6 | 7.7                          |              | obolfactory bulb, right                        | -0.2 | 2.8  | -3.0 | 4.6      |
|                              | field CA1 of the hippocampus, right                   | -1.5 | -3.4 | -1.5 | 7.5                          |              |                                                |      |      |      |          |
| 22101                        | secondary somatosensory cortex, left                  | 3.8  | 0.8  | -3.2 | 7.4                          |              |                                                |      |      |      |          |
|                              | primally somatosensory cortex, left                   | 3.1  | 1.6  | -2.8 | 7.1                          |              |                                                |      |      |      |          |
|                              | insular cortex, left                                  | 2.7  | 2.1  | -1.9 | 6.7                          |              |                                                |      |      |      |          |
| 6867                         | simple lobule, right                                  | -2.5 | -5.8 | -2.4 | 7.4                          |              |                                                |      |      |      |          |
|                              | crus 1 of the ansiform lobule, right                  | -2.4 | -6.0 | -1.5 | 7.0                          |              |                                                |      |      |      |          |
|                              | lobules 6 of the cerebellar vermis, right             | -0.8 | -7.8 | -1.7 | 6.6                          |              |                                                |      |      |      |          |
| 28716                        | primally somatosensory cortex, right                  | -3.4 | 1.2  | -1.9 | 7.2                          |              |                                                |      |      |      |          |
|                              | frontal cortex, area3, right                          | -2.5 | 2.1  | -1.9 | 7.1                          |              |                                                |      |      |      |          |
|                              | secondary somatosensory cortex, right                 | -3.8 | 0.8  | -2.7 | 6.9                          |              |                                                |      |      |      |          |
| 670                          | lobules 2 and 3 of the cerebellar vermis, left        | 0.3  | -5.9 | -2.8 | 5.5                          |              |                                                |      |      |      |          |
| 250                          | primally auditory cortex, left                        | 4.4  | -3.7 | -2.8 | 5.1                          |              |                                                |      |      |      |          |
